# Supplementary material for: Enzymatically cross-linked hydrogels based on a linear poly(ethylene glycol) analogue for controlled protein release and 3D cell culture
Source: Royal Society of Chemistry journal article supplement (doi:10.1039/c8tb01949e), 2018-01-01
Supplement: c8tb01949e1.pdf [file c8tb01949e1.pdf]

## Supplementary Data

Enzymatically cross-linked hydrogels based on a linear  
poly(ethylene glycol) analogue for controlled protein  
release and 3D cell culture

*Danni Wang, Xiaowei Yang, Qiong Liu, Lin Yu<sup>\*</sup>, Jiandong Ding*

*State Key Laboratory of Molecular Engineering of Polymers, Department of  
Macromolecular Science, Fudan University, Shanghai 200438, China*

\* Corresponding author.

*E-mail address:* yu\_lin@fudan.edu.cn (L. Yu)

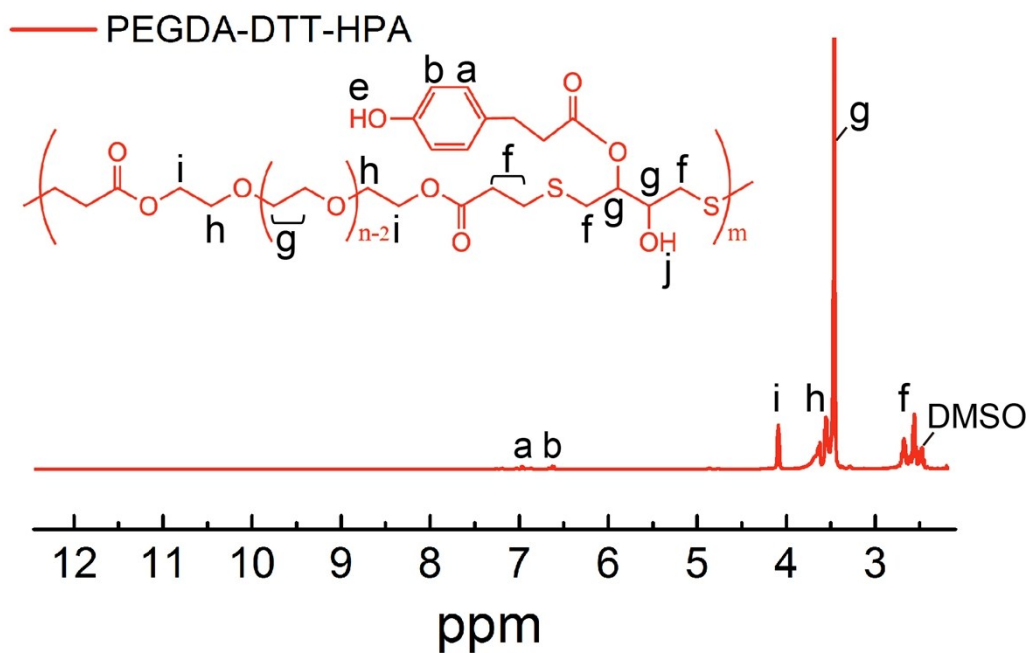

**Fig. S1.**  $^1\text{H}$  NMR spectrum of the PEGDA-DTT-HPA copolymer in  $\text{DMSO-}d_6$  after  $\text{D}_2\text{O}$  exchange.

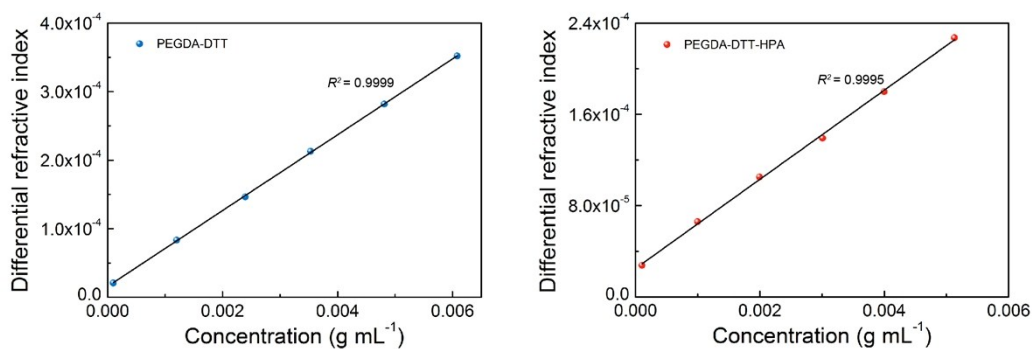

**Fig. S2.**  $dn/dc$  results of the indicated samples determined by a refractive index detector in DMF.

**Table S1.** Effect of molar ratio on the properties of PEGDA-DTT-HPA.

| Entry | Sample          | Molar ratio <sup>a</sup> | $DS_{\text{HPA}}$ <sup>b</sup> | Solubility in water | Gel formation by HRP |
|-------|-----------------|--------------------------|--------------------------------|---------------------|----------------------|
| 1     | PEGDA-DTT-HPA-1 | 0.04                     | 0.035                          | soluble             | +                    |
| 2     | PEGDA-DTT-HPA-2 | 0.14                     | 0.13                           | soluble             | +                    |
| 3     | PEGDA-DTT-HPA-3 | 0.80                     | 0.425                          | insoluble           | -                    |

<sup>a</sup> Molar ratio of 3-(4-hydroxyphenyl) propionic acid (HPA) to the hydroxyl groups of the PEGDA-DTT copolymer; <sup>b</sup> Determined by  $^1\text{H}$  NMR.

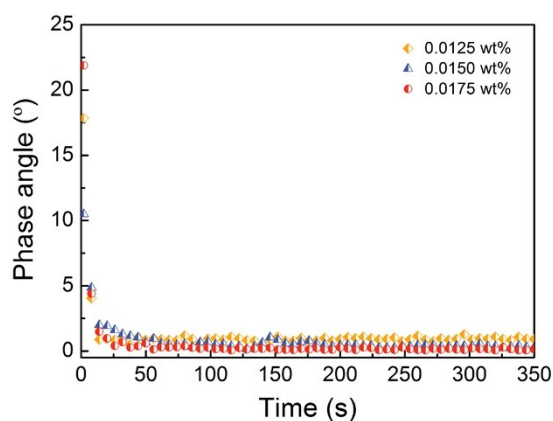

**Fig. S3.** Phase angle ( $\delta$ ) of PEGDA-DTT-HPA hydrogels with varying concentrations of  $\text{H}_2\text{O}_2$  as a function of time. The measurement was taken with constant strain of 1.0% (selected according to the LVER test) and the oscillation frequency was set at 1 Hz. The  $DS_{\text{HPA}}$  of PEGDA-DTT-HPA was 0.13. The final concentrations of the PEGDA-DTT-HPA copolymer and HRP were 8.0 wt% and 0.0125 mg mL<sup>-1</sup>, respectively for all the tested samples.

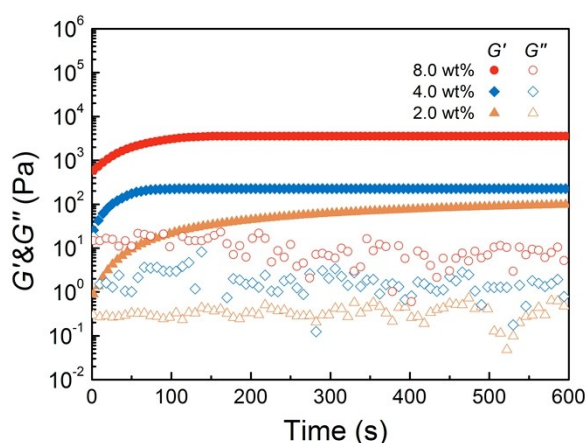

**Fig. S4.** Storage modulus  $G'$  and loss modulus  $G''$  of PEGDA-DTT-HPA hydrogels with indicated concentrations of the PEGDA-DTT-HPA copolymer as a function of time. The measurement was taken with constant oscillation strain of 1.0% (selected according to the LVER test) and the oscillation frequency was set at 1 Hz. The  $DS_{\text{HPA}}$  of PEGDA-DTT-HPA was 0.13. The final concentrations of  $\text{H}_2\text{O}_2$  and HRP were 0.0175 wt% and 0.0125 mg mL<sup>-1</sup>, respectively for all the tested samples.

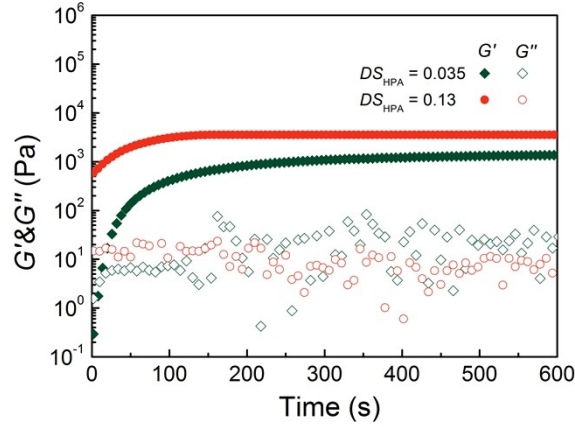

**Fig. S5.** Storage modulus  $G'$  and loss modulus  $G''$  of PEGDA-DTT-HPA hydrogels with different  $DS_{\text{HPA}}$  of PEGDA-DTT-HPA as a function of time. The measurement was taken with constant oscillation strain of 1.0% (selected according to the LVER test) and the oscillation frequency was set at 1 Hz. The final concentrations of PEGDA-DTT-HPA ( $DS_{\text{HPA}} = 0.035$ ,  $DS_{\text{HPA}} = 0.13$ ),  $\text{H}_2\text{O}_2$  and HRP were 8.0 wt%, 0.0175 wt% and  $0.0125 \text{ mg mL}^{-1}$ , respectively for all the tested samples.

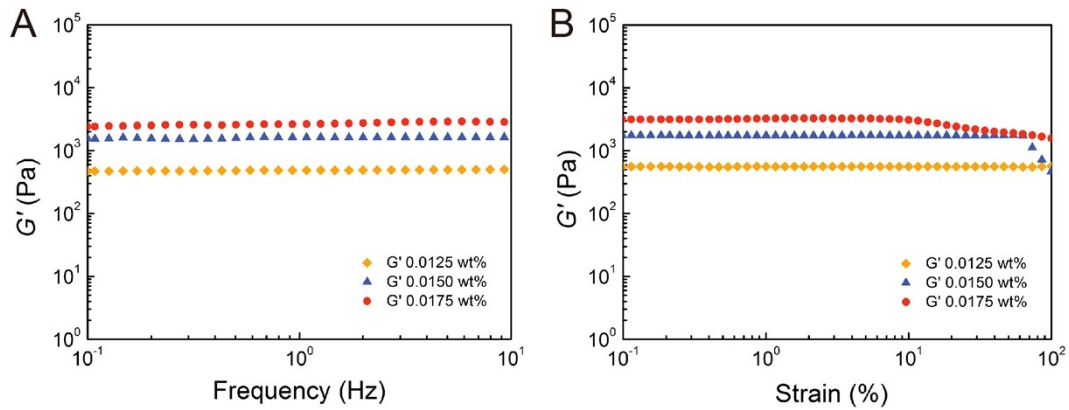

**Fig. S6.** (A) Frequency sweep and (B) amplitude sweep of PEGDA-DTT-HPA hydrogels with varying concentrations of  $\text{H}_2\text{O}_2$ . The  $DS_{\text{HPA}}$  of PEGDA-DTT-HPA was 0.13. The final concentrations of the PEGDA-DTT-HPA copolymer and HRP were 8.0 wt% and  $0.0125 \text{ mg mL}^{-1}$ , respectively for all the tested samples.

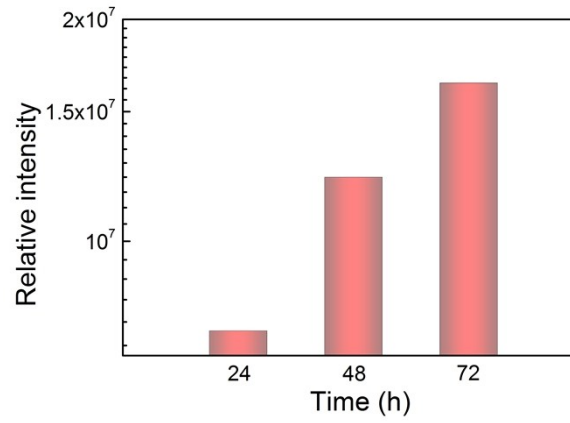

**Fig. S7.** Relative fluorescent intensity of 3D confocal microscopy images of hMSCs-LifeAct-EGFP in Gel-2 after culture for 24, 48, and 72 h determined by confocal laser scanning microscope.
